# Supplementary material
Source: PubMed Central journal article supplement (PMC2745003)

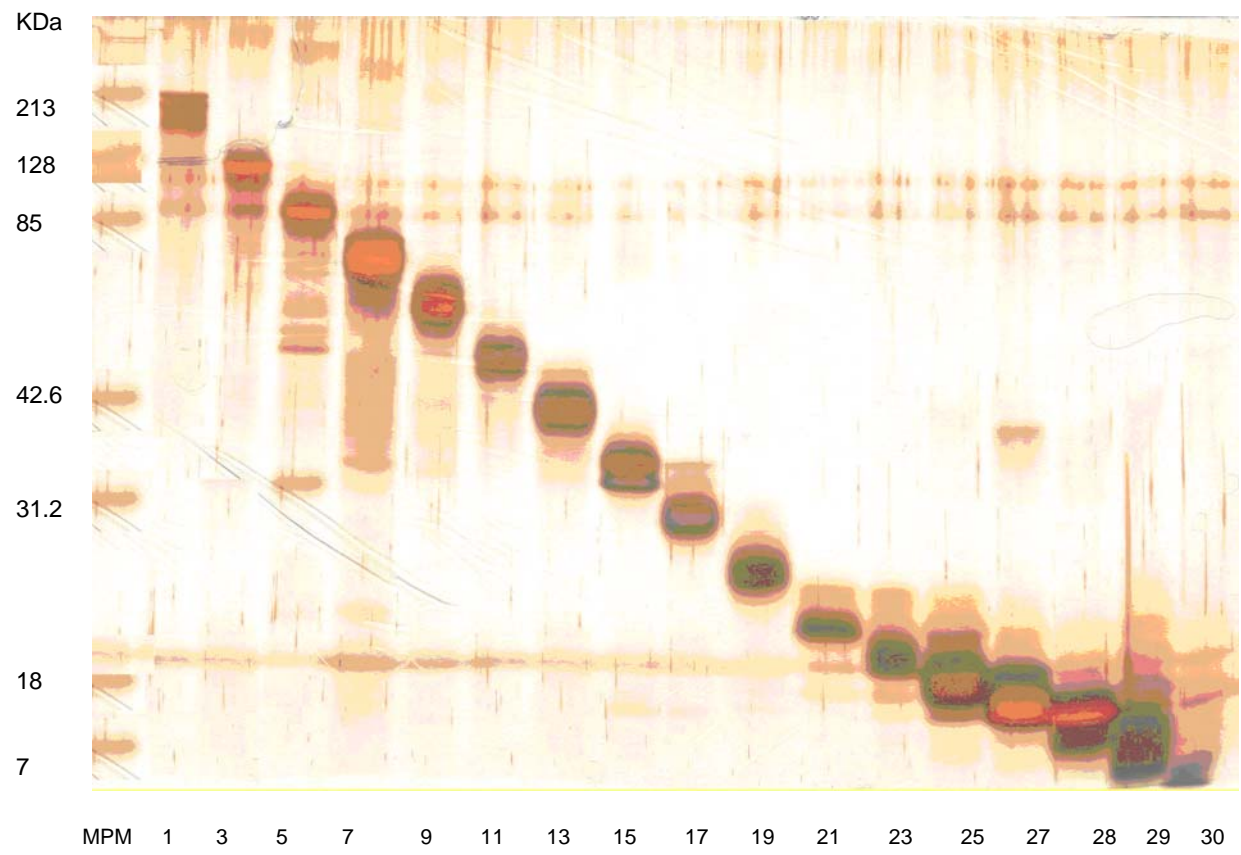

Supplement: supp_16_9_1352__1.pdf [file supp_16_9_1352__1.pdf]
